# Supplementary material for: Exploring the fitness benefits of genome reduction in Escherichia coli by a selection-driven approach
Source: PubMed Central journal article supplement (PMC7193553; doi:10.1038/s41598-020-64074-5), 2020-04-30
Supplement: 41598_2020_64074_MOESM1_ESM.pdf [file 41598_2020_64074_MOESM1_ESM.pdf]

**Exploring the fitness benefits of genome reduction in *Escherichia coli* by a selection-driven approach**

Viktor Vernyik, Ildikó Karcagi, Edit Tímár, István Nagy, Ádám Györkei, Balázs Papp, Zsuzsanna Györfy, György Pósfai

**Supplementary information**

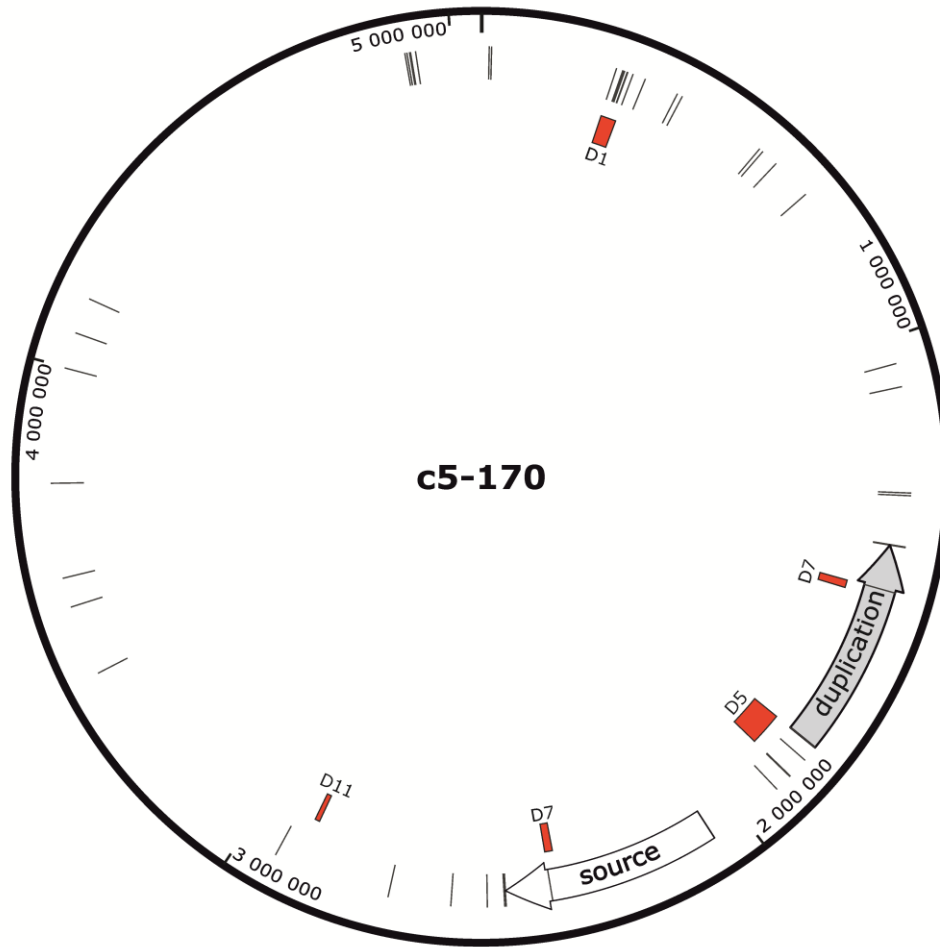

Figure S1. Location of the duplication in the random deletion strain from the fifth cycle (in strain c5-170). The genome map of wild-type MG1655 is extended with the 398-kb long duplication, indicated with grey arrow. The source of the duplicated region is shown with white arrow. Thin lines represent insertion sequences, and red boxes show random deletions (D1, D5, D7, D11).

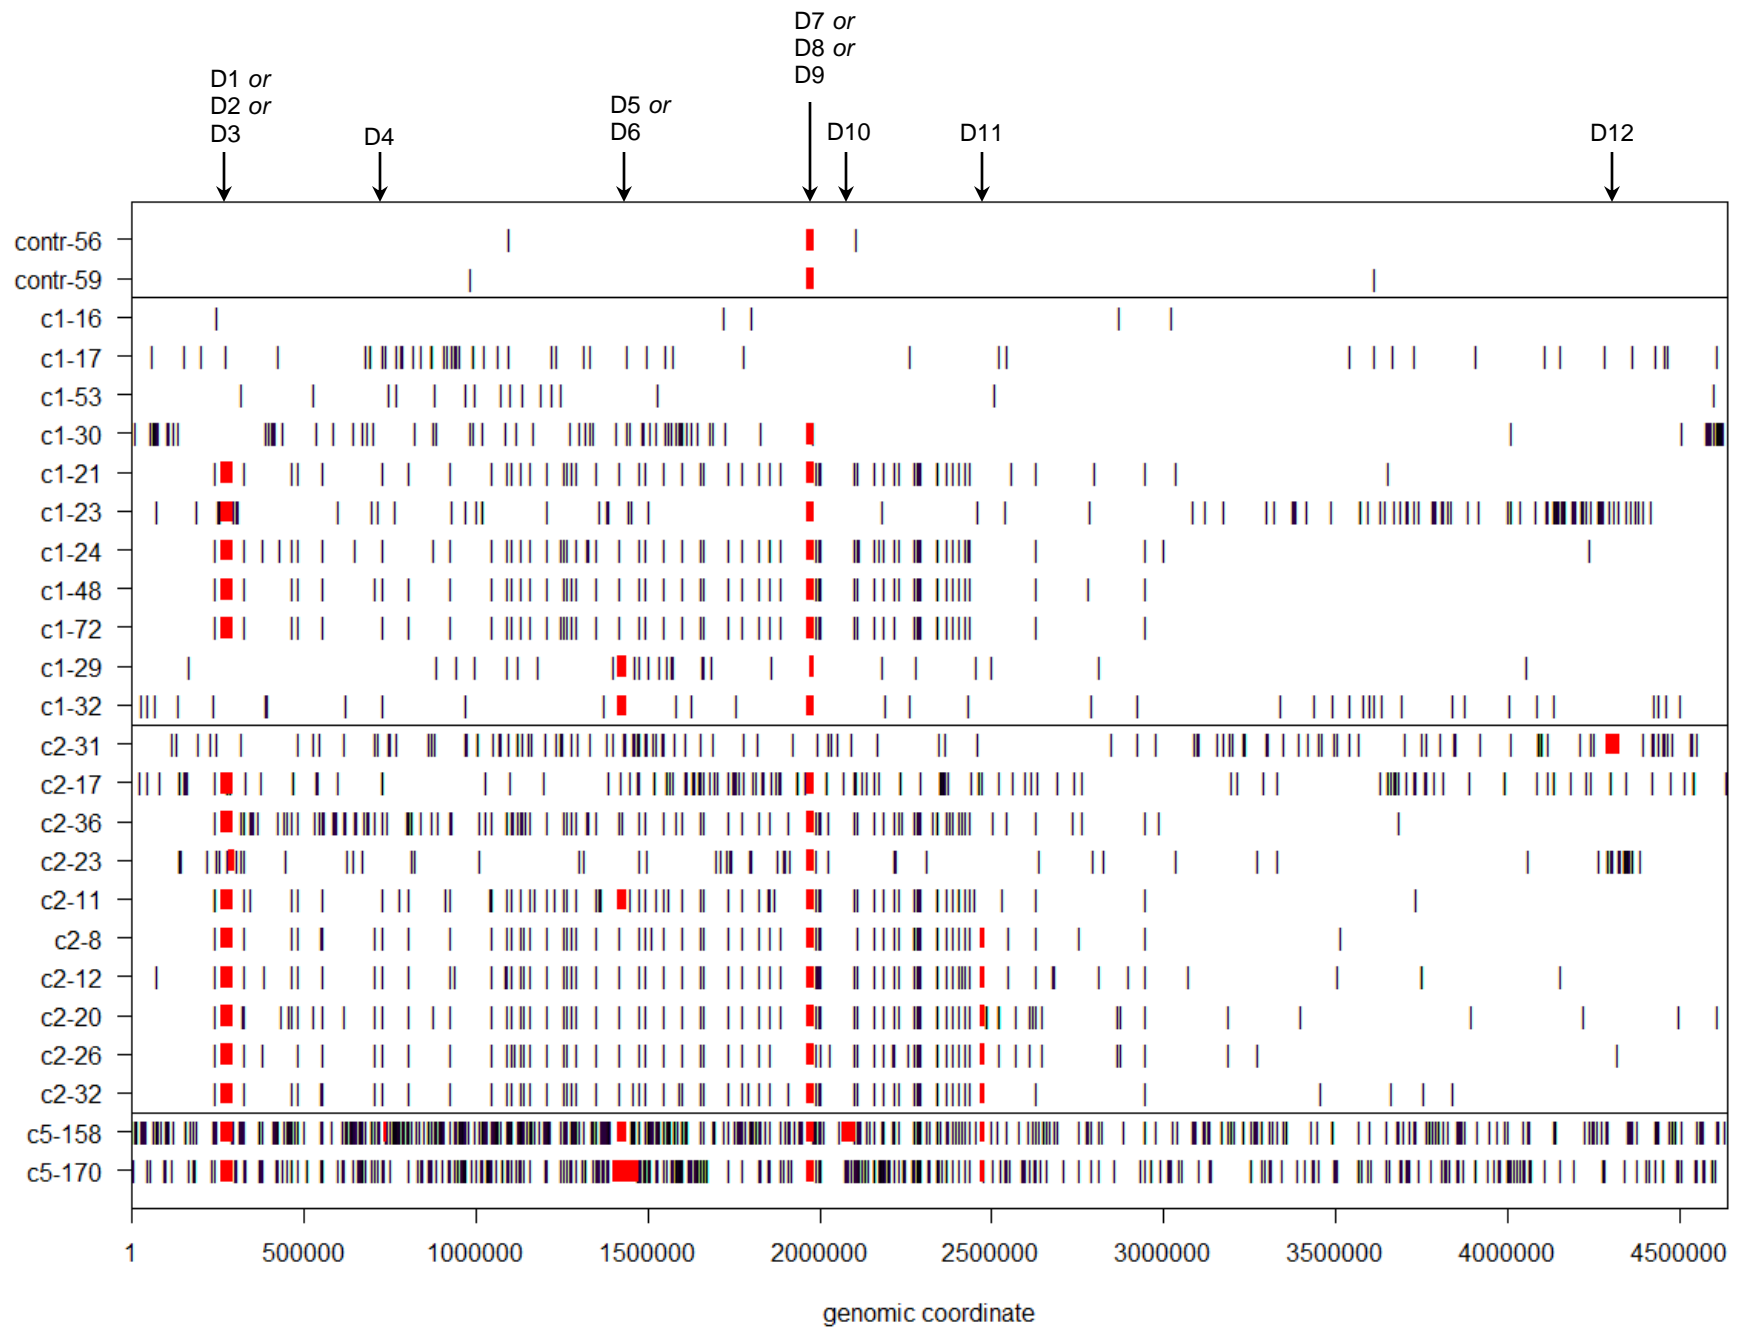

Figure S2. Distribution of SNVs in the genomes of the control strains (carried through a single cycle without transposon insertion), and deletion strains (obtained by the mutagenic procedure). Red boxes represent deletions D1 to D12, vertical lines indicate SNVs.

**a**

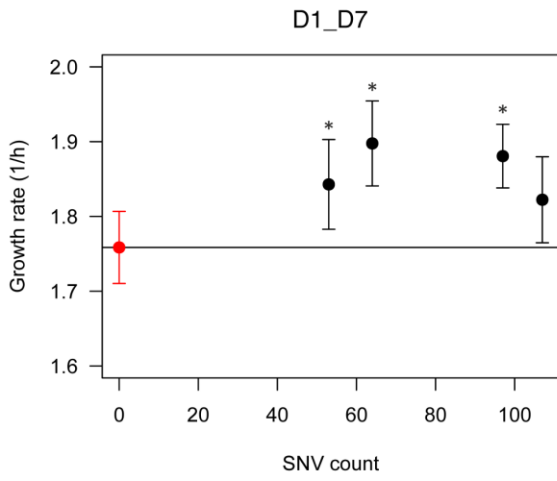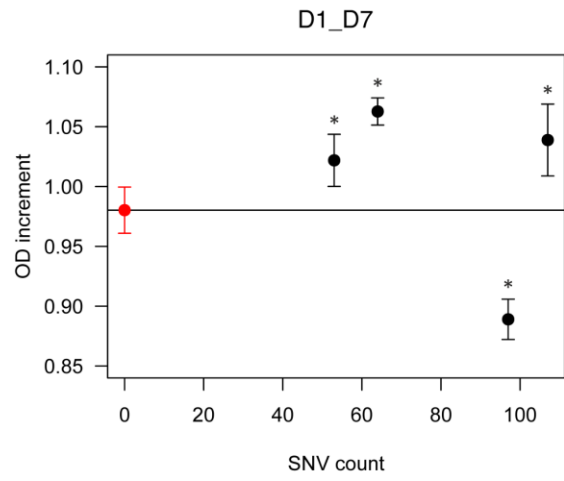

**b**

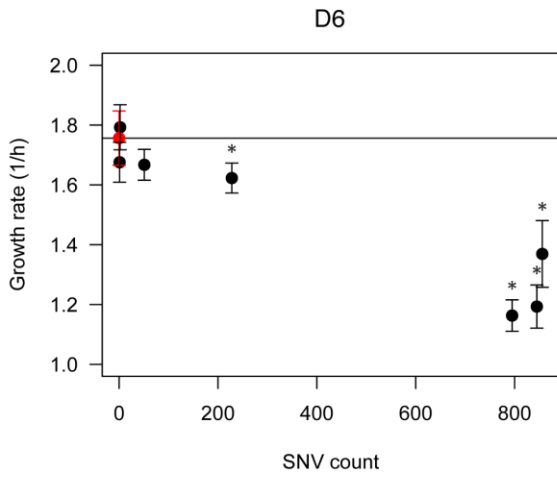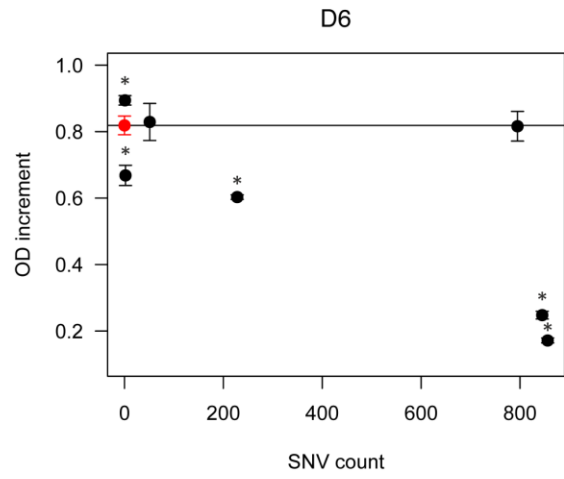

**c**

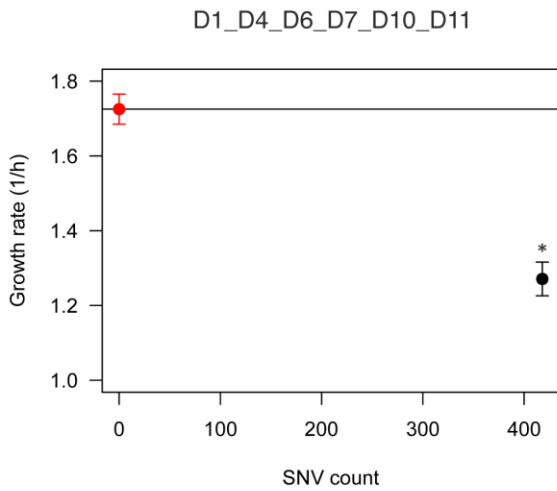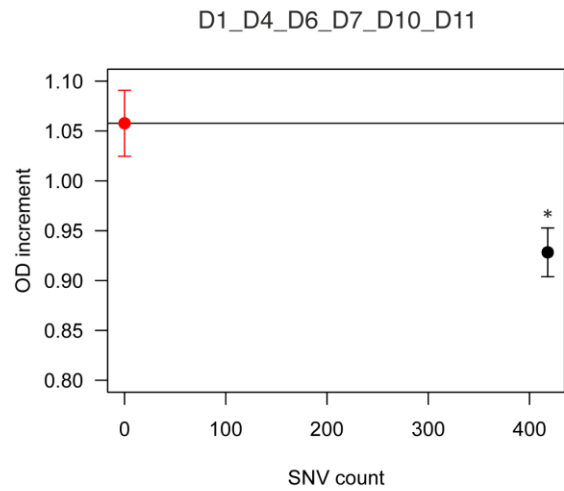

Figure S3. Growth rate and OD increment data of a double- (a), a single- (b), and a six-deletion strain (c), measured in LB. Strains are identified by the deletions (D1 to D12) they carry. The single- and the double-deletion strains are represented by several sequenced variants, possessing various numbers of point mutations. Dots show average growth parameters based on at least 5 replicates. The reconstructed strain with zero point mutation is marked with red. Error bars show 95% confidence intervals. Asterisks show significant difference in comparison to the corresponding strain with zero point mutation (Welch's t-test,  $P < 0.05$ ).

**a**

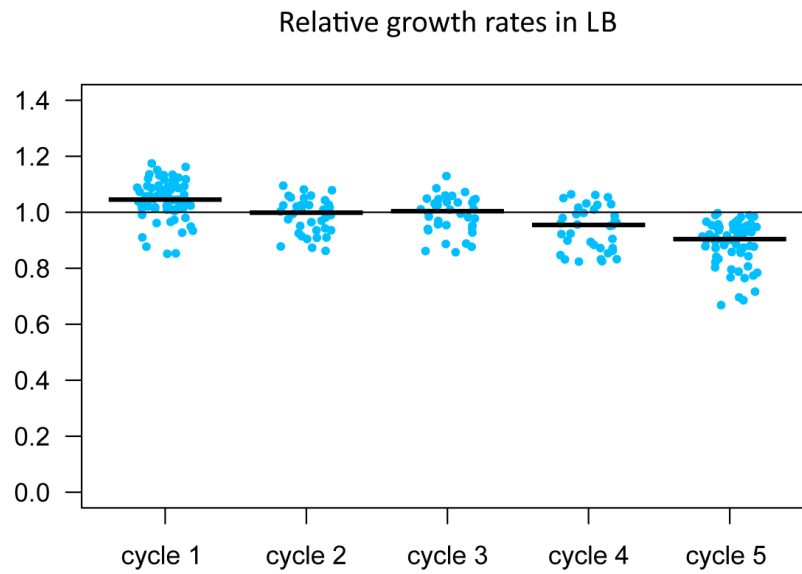

**b**

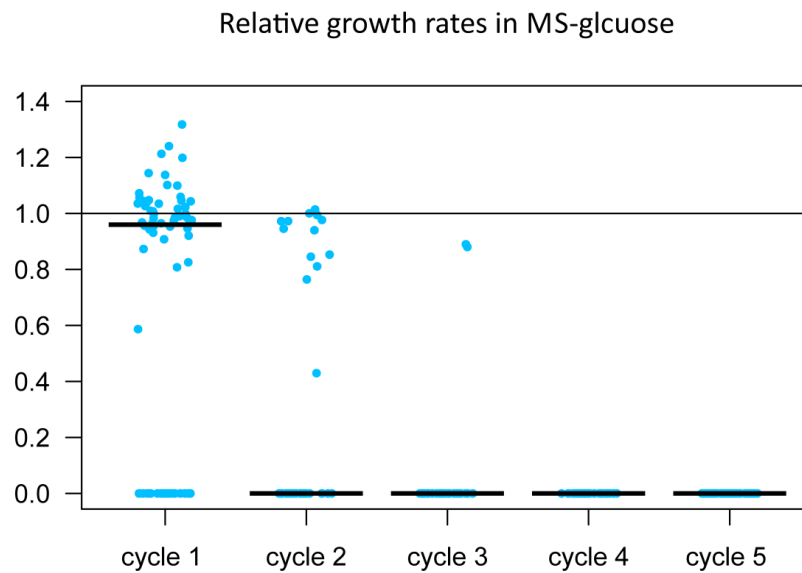

Figure S4. Growth rates of strains obtained in the highly mutagenic protocol. Measurements were carried out both in (a) rich medium (LB) and in (b) minimal medium (MS-glucose). For each cycle, growth of 30 randomly chosen colonies were tested. Growth rates were compared to the average of the parental MG1655. Dots represent the relative growth rate of an individual strain.

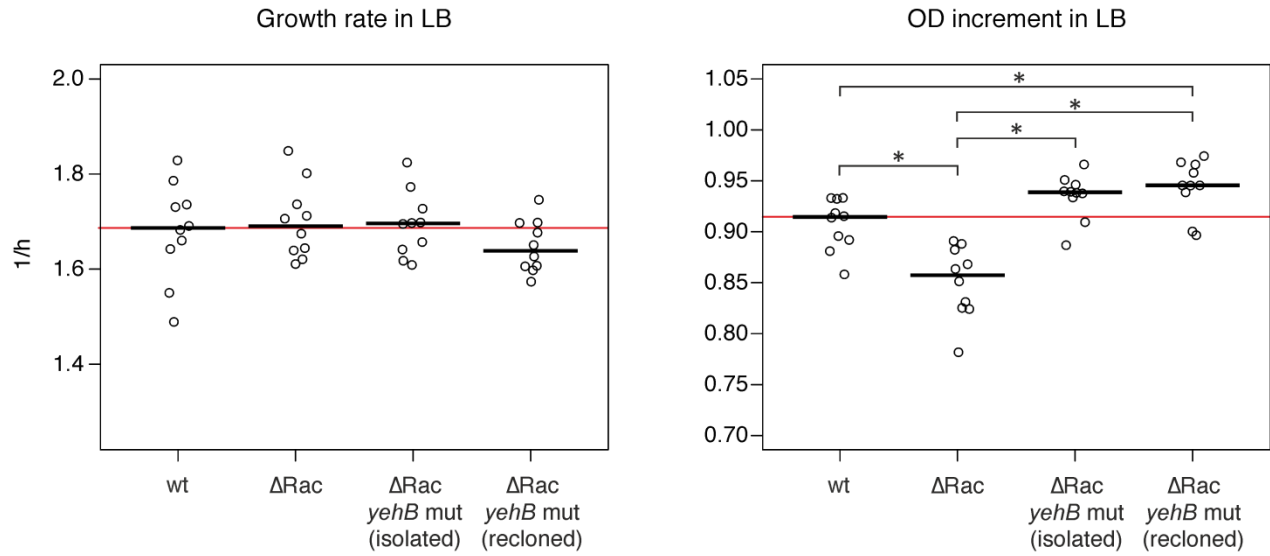

Figure S5. Effect of a compensatory point mutation in the Rac deletion strain: growth parameters of the wild-type and the Rac deletion strain with or without a point mutation in *yehB*. Horizontal black lines show medians of 10 replicate measurements. Asterisks indicate significant difference between strains ( $P < 0.05$ , one-way ANOVA with post hoc Tukey's test).



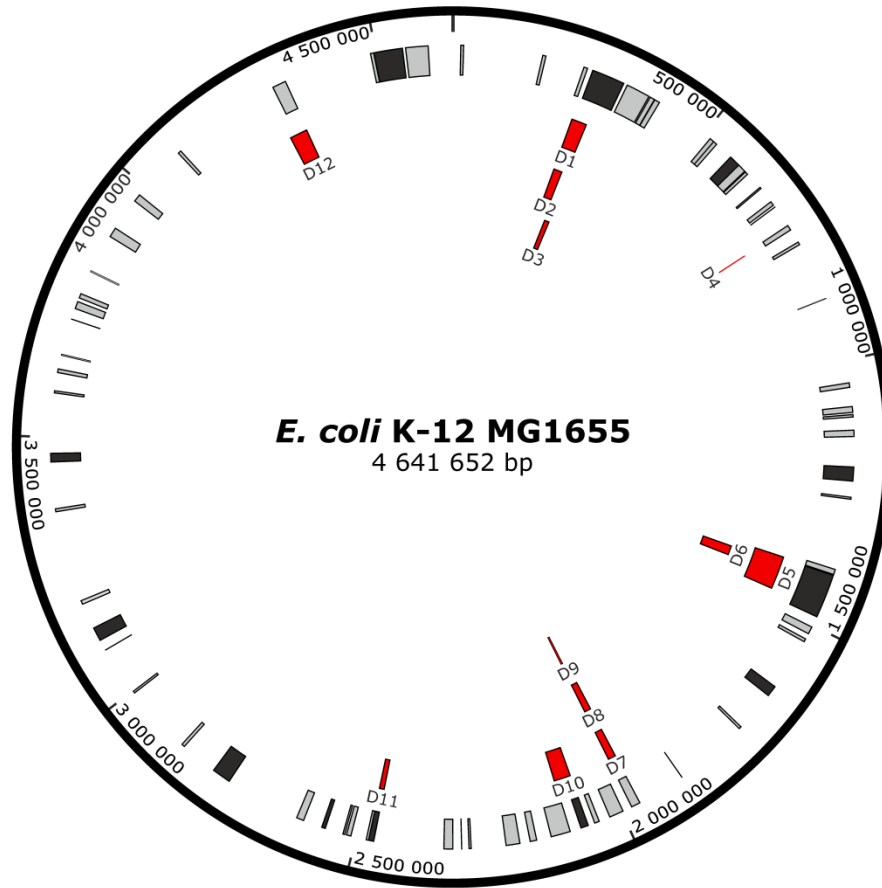

Figure S6. Comparison of deletions obtained by targeted and random methods. Red boxes indicate random deletions obtained in this work (D1 to D12), black boxes represent targeted deletions of the multi-deletion strain MDS12<sup>1</sup>, grey boxes show additional deletions of MDS69<sup>2</sup>.

a

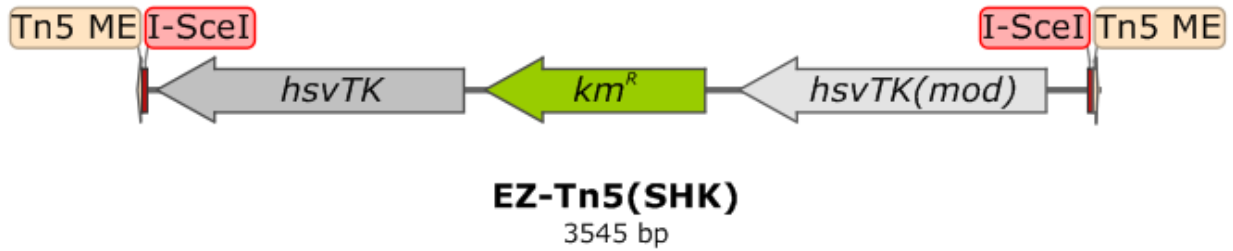

b

```
CTGTCTCTTATACACATCTTAGGGATAACAGGGTAATCGATGCTGTGCGAAACACGGTGCCTGACTGCAAGCTTTCAG
TTAGCCTCCCCATCTCCCGGGCAAACGTGCGCGCCAGGTCGCATATCGTTCGGTATGGAGCCGGGGGTGGTGACGTGG
GTCTGGACCATCCCGGAGGTAAGTTGCAGCAGGGCGTCCCGGCAGCCGGCGGGCGATTGGTTCGTAATCCAGGATAAAG
ACGTGCATGGAACGGAGGCGTTTGGCCAAGACGTCCAAGGCCAGGCCAAACACGTTATACAGGTCGCCGTTGGGGGCC
AGCAACTCGGGGGCCCGAAACAGGGTAAATAACGTGTCCCGATATGGGGTCTGGGGCCCGCTTGCTCTGGGGCTCG
GCACCCTGGGGCGGCACGGCCGTCCCGAAAGCTGTCCCGAGTCTCCCGCCACGACCCGCCGCACTGCAGATACCGC
ACCGTATTGGCAAGTAGCCCGTAAACGCGGCGAATCGCAGCCAGCATAGCCAGGTCCAGCCGCTCGCCGGGGCGCTGG
CGTTTGGCCAGGCGGTGATGTGTCTGTCTCCGGAAGGGCCCAAGCACGATGTTGGTGCCGGGCAAGGTCGGCGGG
ATGAGGGCCACGAACGCCAGCACGGCCTGGGGGTTCATGCTGCCATAAGGTACCGCGCGGCCGGGTAGCACAGGAGG
GCGGCGATGGGATGGCGGTGCAAGATGAGGGTGAGGGCCGGGGCGGGGCATGTGAGCTCCCAGCCTCCCCCCGATA
TGAGGAGCCAGAACGGCGTCCGTACGGCATAAGGCATGCCATTTGTTATCTGGGCGCTTGTCAATACCACCGCCGCG
TCCCGGCCGATATCTCACCTGGTTCAGGCGGTGTTGTGTGGTGTAGATGTTTCGCGATTGTCTCGGAAGCCCCAGC
ACCCGCCAGTAAGTCATCGGCTCGGGTACGTAGACGATATCGTTCGCGCAACCCAGGGCCACCAGCAGTTGCGTGGTG
GTGGTTTTCCCATCCCGTGGGGACCGTCTATATAAACCCGCAGTAGCGTGGGCATTTTCTGCTCCGGGCGGACTTCC
GTGGCTTCTTGTGCGGGCGAGGGCGCAACGCCGTACGTCCGTTGCTATGGCCGCGAGAACCGCGCAGCCTGGTGAAC
GCAGACGCGTGTGATGGCCGGGTACGAAGCCATGGCTAGTATTTCTCCTCTTTCTCTAGTAGTGCTCAGTATCTCT
ATCACTGATAGGGATGTCAATCTCTAAGCTAATTAATTAGAAAAATTCATCCAGCATCAGATGAAATTCAGTTTGTTC
ATATCCGGATTATCAATGCCATATTTCTGAAACAGACGTTTTTTCAGGCTCGGGCTAAATTCGCCCAGGCAGTTCCAC
AGAATGGCCAGATCCTGATAACGATCCGCAATGCCACACGGCCACATCAATGCAGCCAATCAGTTTGCCTTCATCG
AAAATCAGGTTATCCAGGCTAAAATCGCCGTGGGTACCCACGCTATCCGGGCTAAACGGCAGCAGTTTATGCATTTCT
TTCCACACCTGTTCCACCGGCCAGCCGTTACGTTTCATCATCAAAATCGCTCGCATCCACCAGGCCGTTGTTTCATACGG
CTCTGCGCCTGGGCCAGACGAAACACACGATCGCTGTTAAACGGGCAGTTGCACACCGGAATGCTATGCAGACGACGC
AGAAACACGGCCAGCGCATCCACAATGTTTTCGCCGCTATCCGGATATCTTCCAGCACCTGAAACGCGGTTTTGCC
GGAATCGCGGTGGTCAGCAGCCACGCATCATCCGGGGTGCGAATAAAATGTTAATGGTTCGGCAGCGGCATAAAATTCG
GTCAGCCAGTTCAGACGCACCATTTTCATCGGTACATCGTTTCGCCACGCTGCCTTTGCCATGTTTCAGAAACAGTTCC
GGCGCATCCGGTTTTGCCATACAGACGATAAATGGTTCGCGCCGCTCTGACCCACGTTATCACGCGCCATTTATAGCCA
TACAGATCCGCATCCATGTTGCTGTTTCAGACCGGACGGCTACAGCTCGTTTCACGCTGAATATGGCTCATTAACACCC
CTTGATTAATGTTTATGTAAGCAGACAGTTTTTATTGTTTCATGATGATATATTTTTATCTTGTGCAATGTAACATCAG
AGATTTTGAGACACAAGCGATGATAAGCTGTCTCGAGTTAATTCGCTTCACCCATTTTCAGTGCAGAGGTACGGGCA
AGATCACAGATGGTTCGGGATACTCCAGGCGTCGTACATGCGTTTTGCACCATGCCGCTAGTCAGTTGAAGCAGCGCA
TCACGACAGCCTGCTGGGCTTTGATCATAATCCAGAATAAAAACATGCATGCTGCGCAGACGCTTAGCCAGAATCC
AGCGCCACGCGAAAACATTTGTACAGATCCCCATTTGGTGCCAGCAGCTCCGGCGCACGGAACAGGGTGAACAGGGTA
TCACCAATGTGCGGACGCGGACCTGCGTTAGACTGAGGTTCCGCACCCCTGCGGAGGAACTGCCGTACCGCTCAGTTGA
CCCCAATCTTCACGCCAACTGCCACCGCATTTGCAGGTAACGGACAGTGTTCGCCAGCAGGCCATATACACGACGAATC
```

```
GCTGCCAGCATCGCCAGATCCAGGCGTTCACCAGGACGTTGACGTTTCGCCAGACGGTCGATATGACGATCTTCTGGC
AGCGCCCCCAGCACGATATTGGTCCCAGGCAGAGTAGGCGGAATCAGTGCAACGAATGCCAGGACGGCCTGTGGGGTC
ATAGAACCCATCAGATAACGTGCAGCAGGATAGCACAGCAGAGCCGCAATCGGGTGACGATCAAAAATCAGGGTCAGG
GCAGGCGGGCGGCATGGCTACTGCCGGCTTCACCACCAATATGCGGCGCCAGAACCGCATCGGTTACTGCGTAAGGC
ATACCCATCGTGATTTGCGCACTGGTCATCACTACGGCTGCATCACC GGCGCTGATTTCCCCTTGGTCCAGACGATGC
TGGGTTCGTATAGATATTAGCAATAGTTTTCACTCGCGCCCAGCACGCGCCAATACGTCATCGGTTTCAGGCACATAAACA
ATATCATCACGGCTGCCCAGCGCAACCAGTAATTGGGTCGTGGTGGTTTTTACCCATACCATGCGGCCCATCAATGTAT
ACGCGTAACAGGGTCGGCATCTTTTGCTCCGGACGAACCTCAGTGGCCTCCTGCTGACGACGCGGACGCAGTGCGGTA
CGACGATTAGAATGACCACGGCTGCGCGCTGCCTGATCGAAAGCAGATGCATGCTGGTGACCCGGATAGCTCGCCATG
GTGTAATCCTCCTAAAAGTTAAACAAAATTTCTAGATATTATAATTGTTATCCGCTCACAAAGCAAATAAATTTTTTCAT
GATTTATCGATGCATGAAGCTCGTGTATGGGGCTGACTTCAGGTGGTCTGCGCGTAATCTCTTGTTCAGCGAAGGGAT
TACCCTGTTATCCCTAAGATGTGTATAAGAGACAG
```

Figure S7. Schematic view (a) and nucleotide sequence (b) of the modified EZ-Tn5 transposon. Tn5 ME: Tn5 transposase recognition sequence (ME=mosaic end); I-SceI: recognition site of I-SceI meganuclease; *km<sup>R</sup>*: kanamycin resistance gene; *hsvTK*: herpes simplex virus thymidine kinase; *hsvTK(mod)*: codon-modified duplicate of *hsvTK*.

Table S1. Single cycle deletions and background SNV numbers in the MDS42-derived strains. Red boxes indicate the presence of a particular deletion.

| Strain      | Deletion |     |     | SNV count |
|-------------|----------|-----|-----|-----------|
|             | D13      | D14 | D15 |           |
| c1_MDS42_1  |          |     |     | 0         |
| c1_MDS42_2  |          |     |     | 0         |
| c1_MDS42_3  |          |     |     | 0         |
| c1_MDS42_4  |          |     |     | 0         |
| c1_MDS42_5  |          |     |     | 1         |
| c1_MDS42_6  |          |     |     | 0         |
| c1_MDS42_8  |          |     |     | 1         |
| c1_MDS42_10 |          |     |     | 0         |
| c1_MDS42_18 |          |     |     | 0         |
| c1_MDS42_7  |          |     |     | 60        |
| c1_MDS42_14 |          |     |     | 13        |
| c1_MDS42_16 |          |     |     | 42        |

Table S2. Features of deletions obtained following one random deletion cycle on MDS42.

| Deletion | Left border | Right border | Size (bp) | Description                                                             | Supposed mechanism                                          |
|----------|-------------|--------------|-----------|-------------------------------------------------------------------------|-------------------------------------------------------------|
| D13      | 266 028     | 301 308      | 35 281    | genomic segment between REP elements (incl. the deletion of lac operon) | recombination between homologous regions of REP23 and REP31 |
| D14      | 266 090     | 283 922      | 17 833    | genomic segment between REP elements                                    | recombination between homologous regions of REP23 and REP28 |
| D15      | 688 716     | 695 120      | 6 405     | genomic segment between <i>ybhR</i> gene and RIP75 element              | unknown, no homology around the deletion                    |

Table S3. Growth parameters of the strains selected for sequencing. (a) MG1655-derived strains obtained by the highly mutagenic protocol, (b) MG1655-derived strains obtained by the weakly mutagenic protocol, (c) MDS42-derived strains obtained by the highly mutagenic protocol. Growth rates and OD increments were compared to that of the parental strain. Mean values and standard deviations (SD) are based on at least 4 replicate measurements.

a

| Number of cycles | Selection   | Strain   | Relative growth rate |       | Relative OD increment |       |
|------------------|-------------|----------|----------------------|-------|-----------------------|-------|
|                  |             |          | Mean                 | SD    | Mean                  | SD    |
| 1 control cycle  | good grower | contr-56 | 1.080                | 0.025 | 1.081                 | 0.019 |
|                  |             | contr-59 | 1.079                | 0.033 | 1.090                 | 0.019 |
| 1 cycle          | good grower | c1-16    | 0.999                | 0.029 | 0.971                 | 0.042 |
|                  |             | c1-17    | 1.019                | 0.042 | 0.979                 | 0.009 |
|                  |             | c1-53    | 1.077                | 0.040 | 1.061                 | 0.014 |
|                  |             | c1-30    | 1.021                | 0.035 | 1.121                 | 0.028 |
|                  |             | c1-21    | 1.024                | 0.063 | 1.127                 | 0.020 |
|                  |             | c1-23    | 1.017                | 0.047 | 1.086                 | 0.013 |
|                  |             | c1-24    | 1.072                | 0.054 | 1.121                 | 0.002 |
|                  |             | c1-48    | 1.026                | 0.053 | 1.094                 | 0.024 |
|                  |             | c1-72    | 1.064                | 0.033 | 1.088                 | 0.033 |
|                  |             | c1-29    | 1.031                | 0.065 | 1.048                 | 0.017 |
|                  | c1-32       | 1.017    | 0.067                | 1.071 | 0.029                 |       |
|                  | random      | c1-5     | 0.671                | 0.014 | 0.795                 | 0.076 |
|                  |             | c1-9     | 1.009                | 0.052 | 0.579                 | 0.047 |
|                  |             | c1-10    | 0.717                | 0.052 | 0.253                 | 0.017 |
|                  |             | c1-11    | 1.039                | 0.064 | 0.693                 | 0.087 |
|                  |             | c1-12    | 0.724                | 0.096 | 0.218                 | 0.039 |
|                  |             | c1-15    | 0.992                | 0.031 | 0.994                 | 0.030 |
|                  |             | c1-6     | 0.623                | 0.076 | 0.356                 | 0.014 |
|                  |             | c1-14    | 0.840                | 0.014 | 0.565                 | 0.012 |
|                  |             | c1-7     | 0.989                | 0.037 | 1.065                 | 0.004 |
| c1-8             |             | 0.901    | 0.017                | 0.939 | 0.016                 |       |
| c1-13            | 1.039       | 0.034    | 1.057                | 0.004 |                       |       |
| 2 cycles         | good grower | c2-31    | 1.058                | 0.055 | 0.965                 | 0.036 |
|                  |             | c2-17    | 0.988                | 0.006 | 1.109                 | 0.009 |
|                  |             | c2-36    | 1.035                | 0.028 | 1.085                 | 0.012 |
|                  |             | c2-23    | 1.112                | 0.041 | 1.152                 | 0.073 |
|                  |             | c2-11    | 1.025                | 0.023 | 1.121                 | 0.050 |
|                  |             | c2-8     | 1.083                | 0.023 | 0.968                 | 0.038 |
|                  |             | c2-12    | 1.063                | 0.020 | 1.102                 | 0.022 |
|                  |             | c2-20    | 1.030                | 0.044 | 1.092                 | 0.060 |
|                  |             | c2-26    | 1.086                | 0.025 | 1.120                 | 0.020 |
|                  |             | c2-32    | 1.107                | 0.049 | 0.947                 | 0.052 |
| 5 cycles         | good grower | c5-158   | 0.841                | 0.058 | 1.042                 | 0.028 |
|                  |             | c5-170   | 0.962                | 0.044 | 1.134                 | 0.035 |

b

| Number of cycles | Selection   | Strain       | Relative growth rate |       | Relative OD increment |       |
|------------------|-------------|--------------|----------------------|-------|-----------------------|-------|
|                  |             |              | Mean                 | SD    | Mean                  | SD    |
| 1 cycle          | good grower | c1_lowmut-80 | 0.997                | 0.049 | 1.028                 | 0.042 |
|                  |             | c1_lowmut-87 | 1.055                | 0.041 | 0.763                 | 0.045 |
|                  | random      | c1_lowmut-51 | 0.986                | 0.036 | 1.030                 | 0.028 |
|                  |             | c1_lowmut-52 | 0.968                | 0.035 | 1.024                 | 0.015 |
|                  |             | c1_lowmut-53 | 0.989                | 0.027 | 1.031                 | 0.027 |
|                  |             | c1_lowmut-54 | 0.998                | 0.026 | 1.040                 | 0.026 |
|                  |             | c1_lowmut-56 | 0.966                | 0.039 | 1.052                 | 0.028 |
|                  |             | c1_lowmut-57 | 1.041                | 0.022 | 0.762                 | 0.025 |
|                  |             | c1_lowmut-58 | 0.955                | 0.031 | 0.989                 | 0.032 |
|                  |             | c1_lowmut-59 | 0.981                | 0.017 | 1.026                 | 0.035 |
|                  |             | c1_lowmut-55 | 0.989                | 0.025 | 1.044                 | 0.017 |
|                  |             | c1_lowmut-60 | 0.974                | 0.024 | 1.017                 | 0.033 |

c

| Number of cycles | Selection | Strain      | Relative growth rate |       | Relative OD increment |       |
|------------------|-----------|-------------|----------------------|-------|-----------------------|-------|
|                  |           |             | Mean                 | SD    | Mean                  | SD    |
| 1 cycle          | random    | c1_MDS42_1  | 0.995                | 0.001 | 1.051                 | 0.067 |
|                  |           | c1_MDS42_2  | 1.005                | 0.015 | 1.052                 | 0.091 |
|                  |           | c1_MDS42_3  | 1.008                | 0.033 | 1.074                 | 0.053 |
|                  |           | c1_MDS42_4  | 0.992                | 0.019 | 1.017                 | 0.005 |
|                  |           | c1_MDS42_5  | 1.003                | 0.027 | 1.006                 | 0.045 |
|                  |           | c1_MDS42_6  | 0.990                | 0.010 | 1.049                 | 0.070 |
|                  |           | c1_MDS42_8  | 0.995                | 0.017 | 1.017                 | 0.010 |
|                  |           | c1_MDS42_10 | 0.993                | 0.020 | 1.053                 | 0.040 |
|                  |           | c1_MDS42_18 | 0.973                | 0.017 | 1.004                 | 0.041 |
|                  |           | c1_MDS42_7  | 0.963                | 0.017 | 0.985                 | 0.023 |
|                  |           | c1_MDS42_14 | 0.952                | 0.016 | 1.028                 | 0.024 |
|                  |           | c1_MDS42_16 | 0.982                | 0.012 | 1.071                 | 0.016 |

Table S4. Strains and plasmids used in this study.

| Strain or plasmid                   | Relevant characteristics                                                                                                                                                               | Function                                                                     | Source or reference            |
|-------------------------------------|----------------------------------------------------------------------------------------------------------------------------------------------------------------------------------------|------------------------------------------------------------------------------|--------------------------------|
| <b><i>E. coli</i> K-12 strains:</b> |                                                                                                                                                                                        |                                                                              |                                |
| MG1655                              | wild-type                                                                                                                                                                              | parental strain for generating random deletions                              | 3                              |
| MDS42                               | multideletional derivative of wild-type MG1655                                                                                                                                         | parental strain for generating random deletions; host of pST76-A derivatives | 4                              |
| MDS42 $\pi$                         | MDS42 strain expressing Pir protein enabling the maintenance of plasmids with R6K $\gamma$ origin of replication                                                                       | host of pSG76-A and pSG76-A-Tn5-SHK plasmids                                 | laboratory stock; <sup>5</sup> |
| <b>Plasmids:</b>                    |                                                                                                                                                                                        |                                                                              |                                |
| pHKH                                | carrying a selection marker ( $km^R$ ) between the two counterselection genes ( <i>hsvTK</i> )                                                                                         | source for selection-counterselection cassette of EZ-Tn5(SHK)                | 6                              |
| pSG76-A                             | carrying $ap^R$ and R6K $\gamma$ -ori, requires Pir protein for replication                                                                                                            | plasmid backbone for creating EZ-Tn5(SHK)                                    | 7                              |
| pSG76-A-Tn5-SHK                     | pSG76-A harbouring $ap^R$ and EZ-Tn5(SHK) transposon                                                                                                                                   | source for EZ-Tn5(SHK) transposon DNA                                        | this study                     |
| pSTAST                              | low-copy number plasmid carrying a temperature-sensitive replicon; expressing I-SceI under the control of the tet promoter; derivative of pSTKST, where $km^R$ is replaced with $ap^R$ | providing I-SceI enzyme upon induction with anhydrotetracycline (aTc)        | laboratory stock; <sup>1</sup> |
| pST76-A derivatives                 | suicide plasmid with temperature-sensitive replicon and $ap^R$                                                                                                                         | generation of targeted, re-constructed deletions                             | 7                              |



## Supplementary references

1. Kolisnychenko, V. *et al.* Engineering a Reduced Escherichia coli Genome. *Genome Res.* **12**, 640–647 (2002).
2. Karcagi, I. *et al.* Indispensability of Horizontally Transferred Genes and Its Impact on Bacterial Genome Streamlining. *Mol. Biol. Evol.* **33**, 1257–1269 (2016).
3. Blattner, F. R. *et al.* The complete genome sequence of Escherichia coli K-12. *Science* **277**, 1453–1462 (1997).
4. Pósfai, G. *et al.* Emergent properties of reduced-genome Escherichia coli. *Science* **312**, 1044–1046 (2006).
5. Platt, R., Drescher, C., Park, S.-K. & Phillips, G. J. Genetic System for Reversible Integration of DNA Constructs and lacZ Gene Fusions into the Escherichia coli Chromosome. *Plasmid* **43**, 12–23 (2000).
6. Tominaga, M. *et al.* Liquid-Based Iterative Recombineering Method Tolerant to Counter-Selection Escapes. *PLoS ONE* **10**, (2015).
7. Pósfai, G., Koob, M. D., Kirkpatrick, H. A. & Blattner, F. R. Versatile insertion plasmids for targeted genome manipulations in bacteria: isolation, deletion, and rescue of the pathogenicity island LEE of the Escherichia coli O157:H7 genome. *J. Bacteriol.* **179**, 4426–4428 (1997).
